# Supplementary material for: Putative Internal Control Genes in Bovine Milk Small Extracellular Vesicles Suitable for Normalization in Quantitative Real Time-Polymerase Chain Reaction
Source: MDPI journal article supplement (doi:10.3390/membranes11120933), 2021-11-26
Supplement: s1 [file s1]

# Putative Internal Control Genes in Bovine Milk Small Extracellular Vesicles Suitable for Normalization in Quantitative Real Time-Polymerase Chain Reaction

Md. Matiur Rahman <sup>1,2,3</sup>, Shigeo Takashima <sup>4</sup>, Yuji O. Kamatari <sup>5</sup>, Yassien Badr <sup>2,6</sup>, Kaori Shimizu <sup>2</sup>, Ayaka Okada <sup>2,7</sup> and Yasuo Inoshima <sup>1,2,7,8\*</sup>

<sup>1</sup> The United Graduate School of Veterinary Sciences, Gifu University, 1-1 Yanagido, Gifu 501-1193, Japan; matiur.vetmed@gmail.com

<sup>2</sup> Laboratory of Food and Environmental Hygiene, Cooperative Department of Veterinary Medicine, Gifu University, 1-1 Yanagido, Gifu 501-1193, Japan; yassienbadr1@gmail.com (Y.B.); skaori@gifu-u.ac.jp (K.S.); okadaa@gifu-u.ac.jp (A.O.)

<sup>3</sup> Department of Medicine, Faculty of Veterinary, Animal and Biomedical Sciences, Sylhet Agricultural University, Sylhet-3100, Bangladesh

<sup>4</sup> Division of Genomics Research, Life Science Research Center, Gifu University, 1-1 Yanagido, Gifu 501-1193, Japan; staka@gifu-u.ac.jp

<sup>5</sup> Division of Instrumental Analysis, Life Science Research Center, Gifu University, 1-1 Yanagido, Gifu 501-1193, Japan; [kamatari@gifu-u.ac.jp](mailto:kamatari@gifu-u.ac.jp)

<sup>6</sup> Department of Animal Medicine, Faculty of Veterinary Medicine, Damanhour University, El-Beheira-22511, Egypt

<sup>7</sup> Education and Research Center for Food Animal Health, Gifu University (GeFAH), 1-1 Yanagido, Gifu 501-1193, Japan

<sup>8</sup> Joint Graduate School of Veterinary Sciences, Gifu University, 1-1 Yanagido, Gifu 501-1193, Japan

\* Correspondence: [inoshima@gifu-u.ac.jp](mailto:inoshima@gifu-u.ac.jp)

**Supplementary Material Table S1.** Primer sequences of nine candidate putative internal control genes in milk sEVs that were not detected in qRT-PCR.

sEVs, small extracellular vesicles; qRT-PCR, quantitative real time-polymerase chain reaction.

| Name of the gene                         | Gene symbol | Primer sequence                                                       | References |
|------------------------------------------|-------------|-----------------------------------------------------------------------|------------|
| Glyceraldehyde 3-phosphate dehydrogenase | GAPDH       | F: 5'-CCGGGAAACTGTGGCGTGATGG-3'<br>R: 5'-AGGTGGAGGAGTGGGTGTCGCTGTT-3' | This study |
| Nuclear valosin-containing protein-like  | NVL         | F: 5'-TCTGCTTTGGTACGGGAGGC-3'<br>R: 5'-ACTCCAGCACCATCACTGCAT-3'       | This study |
| Beta-2-microglobulin                     | B2M         | F: 5'-AGCGTACTCCAAAGATTCAGGTT-3'<br>R: 5'-ATGATGCTGCTTACATGTCTCGAT-3' | This study |
| Serum albumin                            | ALB         | F: 5'-TGCCCTGTGCAGAAGACTATCTA-3'<br>R: 5'-CGAGCTCAACAAGTGCAGTT-3'     | This study |
| Antizyme inhibitor 1                     | OAZI        | F: 5'-GCCAAACGCATTAAGTGGCG-3'<br>R: 5'-TGTCCTCGCGGTTCTTGTG-3'         | This study |
| TATA-box binding protein                 | TBP         | F: 5'-TGAACGTCATGGATCAGAACAACA-3'<br>R: 5'-TGCCGTAAGGCATCATTGGA-3'    | This study |
| Protein kinase CGMP-dependent 1          | PRKG1       | F: 5'-AGCACAAATGGTTTGAGGGCTTTA-3'<br>R: 5'-AGGTGGCGGTTTCATCATTGTC-3'  | This study |
| 18S ribosomal RNA                        | 18SrRNA     | F: 5'-TTCGATGGTAGTCGCTGTGC-3'<br>R: 5'-TTGGATGTGGTAGCCGTTTCT-3'       | [23]       |
| 28S ribosomal RNA                        | 28SrRNA     | F: 5'-CTAGTAACGGCGAGCGAAGA-3'<br>R: 5'-AGGCGTTCAGTCATTATCCAA-3'       | [24]       |
